# Supplementary material
Source: publisher figshare collection journal article supplement (https://wiley.figshare.com/articles/dataset/_/3551700)
Supplement: Supplementary file 1 [file 1]

Archive with 2 entries (2 files):
- appendix-E.htm
- appendix-E.pdf
