# Supplementary material
Source: publisher figshare collection journal article supplement (https://wiley.figshare.com/articles/dataset/_/3551700)
Supplement: Supplementary file 1 [file 1 › appendix-E.htm]

Ecological Archives E092-133-A5


### *Ecological Archives* E092-133-A5

### **Sebastian J. Schreiber, Reinhard Bürger, and Daniel I. Bolnick. 2011. The community effects of phenotypic and genetic variation within a predator population. *Ecology* 92:1582–1593.**

Appendix E. Quantifying ecological trade-offs.

View / Download PDF

---


[Back to E092-133]
