# Supplementary material
Source: publisher figshare collection journal article supplement (https://wiley.figshare.com/articles/dataset/_/3551700)
Supplement: Supplementary file 1 [file 1 › appendix-E.pdf]

*Ecological Archives* E092-133-A5

**Sebastian J. Schreiber, Reinhard Bürger, and Daniel I. Bolnick. 2011. The community effects of phenotypic and genetic variation within a predator population. *Ecology* 92:1582–1593.**

## Appendix E: Quantifying ecological trade-offs

In our model, various kinds of trade offs result from the assumptions that a given predator phenotype,  $x$ , differs in its attack rates,  $a_1(x)$  and  $a_2(x)$ , on the two preys and that the distribution of phenotypes is Gaussian with a fixed variance. Because the attack rates are Gaussian functions of the phenotypic value, a phenotype with a high attack rate on prey 1 will generally have a low attack rate on prey 2, and vice versa. More precisely, if  $a_1$  is the attack rate of a phenotype on prey 1, a simple calculation shows that its attack rate on prey 2 is

$$a_2 = a_1 \exp \left[ \frac{-2\theta^2 + 2\theta\tau\sqrt{-2\ln(a_1/\alpha)}}{\tau^2} \right], \quad (\text{E.1})$$

where the notation of Appendix C is used. It is straightforward to show that the trade-off curve is concave (convex) if  $\theta$  is small (large), whereas it is ‘wave like’ for intermediate  $\theta$  (see Figure E1).

In addition, a trade off between the components  $\bar{a}_1(\bar{x})$  and  $\bar{a}_2(\bar{x})$  of mean fitness is induced. This trade-off depends not only on  $\theta$ ,  $\alpha$ , and  $\tau$ , but in particular on the phenotypic variance  $\sigma^2$ . It is given by

$$\bar{a}_2 = \bar{a}_1 \exp \left[ \frac{-2\theta^2 + 2\theta\sqrt{-2(\sigma^2 + \tau^2)\ln \frac{\bar{a}_1\sqrt{\sigma^2 + \tau^2}}{\alpha\tau}}}{\sigma^2 + \tau^2} \right]. \quad (\text{E.2})$$

Of course, in the absence of phenotypic variation ( $\sigma^2 = 0$ ), (E.2) reduces to (E.1). It is not difficult to show that  $\bar{a}_2$  is a concave function of  $\bar{a}_1$  whenever  $\theta \leq \sqrt{\sigma^2 + \tau^2}$ . Otherwise, it may be convex, concave, or more complicated (see Figure E1).

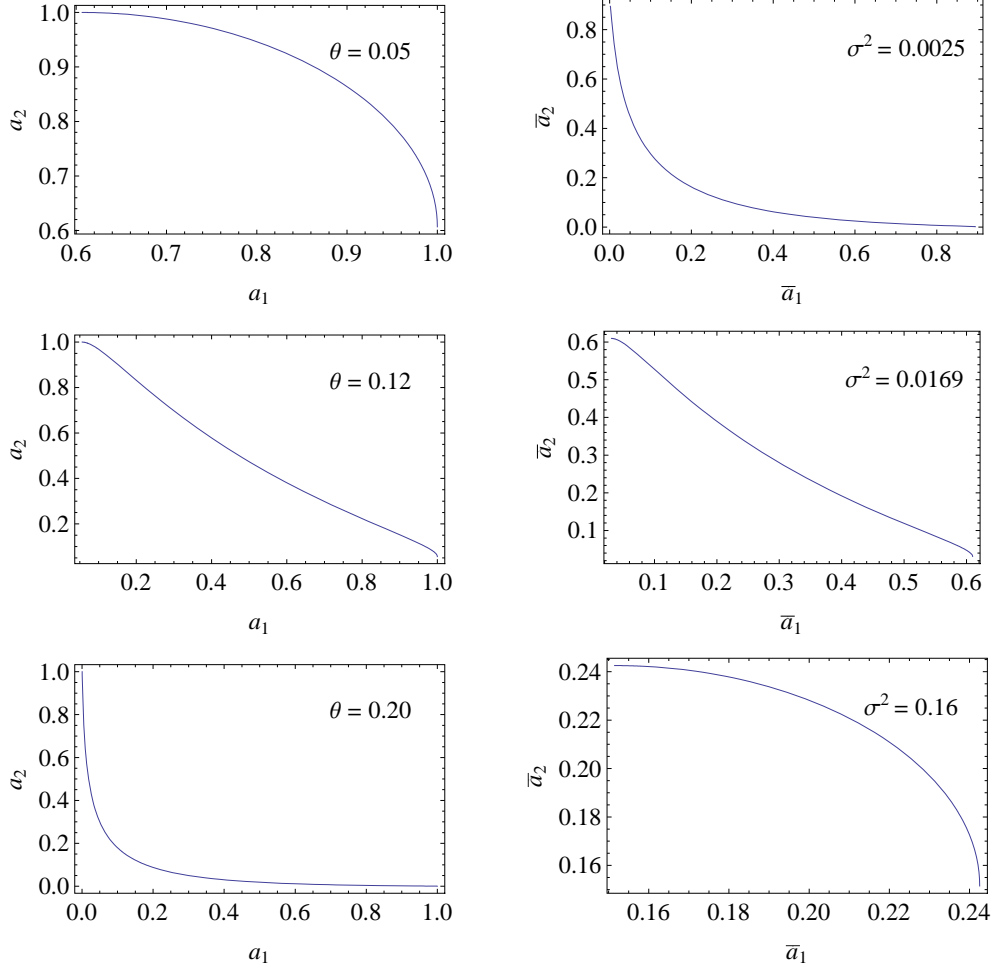

Fig. E1.— Phenotypic and fitness trade offs. (a) The three graphs in the left panel display the trade-off curves resulting from (E.1) for the three indicated values of  $\theta$ ,  $\alpha = 1$  (which solely determines the scale on both axes), and  $\tau = 0.1$ . The trade-off functions are shown on their range of admissible values,  $[\exp(-2\theta^2/\tau^2)\alpha, \alpha]$ . (b) The three graphs in the right panel display the trade-off curves resulting from (E.2) for the three indicated values of  $\sigma^2$ , and  $\alpha = 1$  (which solely determines the scale on both axes),  $\theta = 0.2$ ,  $\tau = 0.1$ . The trade-off functions are shown on their range of admissible values,  $\left[\exp\left(\frac{-2\theta^2}{\sigma^2+\tau^2}\right) \frac{\alpha\tau}{\sqrt{\sigma^2+\tau^2}}, \frac{\alpha\tau}{\sqrt{\sigma^2+\tau^2}}\right]$ .
